# Supplementary material
Source: Frontiers journal article supplement (https://www.frontiersin.org/articles/78930)
Supplement: Data_Sheet_1.PDF [file Data_Sheet_1.PDF]

## Supplementary Material: Tables S1-S7

Table S1. Stimulus Items: Commercial Logos Recall and Recognition Test

| Logo                               | Recognition Test Distractors             |
|------------------------------------|------------------------------------------|
| Chili's                            | Dr. Pepper, Old Spice                    |
| McDonald's                         | Mrs. Fields, Mitsubishi                  |
| Audi                               | Corvette, Rolex                          |
| Lexus                              | Lamborghini, Lacoste                     |
| WWF                                | Animal Planet, Air China                 |
| Aunt Jemima (older version, 1960s) | Mrs. Butterworth, Kentucky Fried Chicken |
| NBC (newer version, 1986)          | ABC, GQ                                  |
| Windows                            | Verizon, Oldsmobile                      |
| Girlscouts                         | Campfire Girls, Betty Crocker            |
| Corvette                           | Cadillac, Chili's                        |
| Shell                              | Hamilton Beach, Lucky Charms             |
| Red Cross                          | Doctors Without Borders, Texaco          |
| Rolex                              | Cartier, Honey Nut Cheerios              |
| Olympics Games                     | World Cup, CBS                           |
| Wendy's                            | Dairy Queen, Kool Aid                    |
| Apple (newer version, 2003)        | Apple Jacks, McDonald's                  |
| Adidas                             | Nike, Yankees                            |
| Mercedes                           | Ferrari, Greyhound                       |
| Lucky Charms                       | Lucky Strike, Playboy                    |
| Ralph Lauren                       | Lacoste, John Deere                      |
| Bell Telephone                     | Taco Bell, Michelin                      |
| Cadillac (newer version, 2002)     | Porsche, Bell Telephone                  |
| Cheetos                            | Cheez Doodles, Animal Planet             |
| Mazda                              | Mercury, Mrs.Fields                      |
| Kentucky Fried Chicken (KFC)       | Long John Silver's, Mr.Clean             |
| Frosted Flakes                     | Rice Krispies, Cheetos                   |
| Honda                              | Hummer, Honeycomb                        |
| American Airlines                  | AirTran Airways, Auntie Anne's           |
| Chevrolet                          | Mazda, Starbucks                         |
| Gerber                             | Enfamil, United Way                      |
| Oldsmobile                         | Pontiac, Olympics                        |
| Mustang                            | Dodge Charger, World Cup                 |
| NY Yankees                         | Mets, New York and Company               |
| Michelin                           | Bridgestone, Honda                       |
| Pontiac                            | Mitsubishi, Shell                        |
| Texaco                             | Toyota, Toshiba                          |
| John Deere                         | International Harvester, Deer Park       |
| NBA                                | MLB, CNN                                 |
| Pepsi                              | Coke, Frosted Flakes                     |

|                                   |                             |
|-----------------------------------|-----------------------------|
| Cheerios                          | Honeycomb, Burt's Bees      |
| Starbucks                         | Dunkin' Donuts, Aunt Jemima |
| Cadillac (older version, 1957)    | Mercedes, American Airline  |
| Apple (older version, 1976)       | Applebee's, ABC             |
| Taco Bell                         | Pacific Bell, Quicktime     |
| Aunt Jemima (newer version, 1989) | Betty Crocker, Girlscouts   |
| United Way                        | Allstate, Wendy's           |
| Nike                              | Reebok, Chevrolet           |
| Quicktime                         | Quicken, Dairy Queen        |
| Pillsbury                         | Nestlé, Pepsi               |
| Greyhound                         | K9 Advantix, Lexus          |
| Kool-Aid                          | Juicy Juice, Red Cross      |
| Air Jordan                        | NBA, Ralph Lauren           |
| Ferrari                           | Mustang, Pillsbury          |
| CBS                               | NBC, WWF                    |
| Toyota                            | Acura, Yamaha               |
| NBC (older version, 1962)         | CNN, MLB                    |
| Mr.Clean                          | Benjamin Moore, Dr. Pepper  |
| Allstate                          | State Farm, Gerber          |
| Playboy                           | GQ, Gymboree                |
| Acura                             | Audi, AirJordan             |
| YAMAHA                            | Steinway, Windows           |

Table S2. Stimulus Items: Music Associated with Events Recall and Recognition Tests

| <b>Song</b>                   | <b>Event or Occasion</b>   | <b>Recognition Test Distractors</b>   |
|-------------------------------|----------------------------|---------------------------------------|
| We Wish You a Merry Christmas | Christmas                  | patriotic, birthday                   |
| Take Me Out to the Ballgame   | baseball game              | horse racing, end of the day          |
| First Call                    | horse racing               | Olympics, New Year's                  |
| NBC chimes                    | NBC                        | bedtime, circus                       |
| Taps                          | military funeral           | romantic, presidential anthem         |
| Bridal Chorus                 | wedding                    | presidential anthem, Christmas        |
| Reveille                      | military wake up           | westerns and chase scenes, wedding    |
| Pomp and Circumstance         | graduation                 | wedding, Olympics                     |
| Star Spangled Banner          | national anthem, patriotic | wedding, congratulations              |
| Entry of the Gladiators       | circus                     | military wake up, graduation          |
| Auld Lang Syne                | New Year's Eve             | congratulations, national anthem      |
| William Tell Overture         | westerns and chase scenes  | circus, funeral                       |
| For He's a Jolly Good Fellow  | congratulations            | New Year's, westerns and chase scenes |
| Wedding March                 | wedding                    | national anthem, military funeral     |
| Lullaby                       | bedtime                    | funeral, patriotic                    |
| Hail to the Chief             | presidential anthem        | graduation, wedding                   |
| Funeral March                 | funeral                    | end of the day, romantic              |
| Stars and Stripes Forever     | patriotic                  | birthday, baseball game               |
| Bugler's Dream                | Olympics                   | baseball game, horse racing           |
| Happy Birthday                | birthday                   | Christmas, military wake up           |

Table S3. Stimulus Items: Sports Recall and Recognition Tests

| Question                                                                                                                            | Correct Response  | Recognition Test Distractors     |
|-------------------------------------------------------------------------------------------------------------------------------------|-------------------|----------------------------------|
| The Yankees are a professional baseball team from what city?                                                                        | New York City     | Boston, Philadelphia             |
| In baseball, which player throws the ball to the batter?                                                                            | pitcher           | catcher, outfielder              |
| What sport does Manchester United play?                                                                                             | soccer            | tennis, basketball               |
| How does each point of a tennis game start?                                                                                         | a serve           | a forehand, a pitch              |
| What term is used when a baseball player hits the ball and runs around all the bases to score?                                      | homerun           | around the world, skyshot        |
| What sport did Michael Jordan play?                                                                                                 | basketball        | tennis, swimming                 |
| How many yards are between the two goal lines of a football field?                                                                  | 100 yards         | 50 yards, 250 yards              |
| Which soccer player protects the net?                                                                                               | goalie            | defenders, referee               |
| How much is the first point of a tennis game worth?                                                                                 | 15                | 30, 5                            |
| What term is used when a basketball player takes more than two steps without bouncing the ball?                                     | traveling         | dribbling, hiking                |
| What is the name of the equipment used to hit a tennis ball?                                                                        | racket            | bat, club                        |
| In baseball there is a covered shelter along each baseline where the players go when off the field. What are these shelters called? | dugouts           | bull pen, forts                  |
| What sport is played in this location? (presented with picture of basketball court)                                                 | basketball        | football, ice hockey             |
| What professional golfer was considered the best in the world from 1999-2003?                                                       | Tiger Woods       | Jack Nicholas, Arnold Palmer     |
| What sport did John McEnroe play?                                                                                                   | tennis            | baseball, football               |
| How many strikes result in a baseball player being out?                                                                             | 3                 | 2, 5                             |
| What is the name of the equipment used to hit the ball in baseball?                                                                 | bat               | racket, club                     |
| What is the name of the shot in which a volleyball player forcefully drives the ball downward over the net?                         | spike             | strike, bump                     |
| What country did the Olympics first take place in?                                                                                  | Greece            | Italy, France                    |
| What US city do the Red Sox come from?                                                                                              | Boston            | Baltimore, Miami                 |
| Which African American track star won four gold medals in the 1936 Berlin Summer Olympics?                                          | Jesse Owens       | Carl Lewis, Reggie White         |
| What sport was Muhammad Ali famous for?                                                                                             | boxing            | football, tennis                 |
| What sport do the Harlem Globetrotters play?                                                                                        | basketball        | soccer, baseball                 |
| What sport does this athlete play? (presented with picture of football player)                                                      | football          | ice hockey, tennis               |
| What country does the Superbowl take place in?                                                                                      | USA               | England, Spain                   |
| What two seasons do the Olympics take place in?                                                                                     | summer and winter | fall and spring, summer and fall |
| Who was the first African-American to play major league baseball in the modern era?                                                 | Jackie Robinson   | John Jorgensen, Babe Ruth        |

|                                                                                                                      |                                                         |                                                                                                   |
|----------------------------------------------------------------------------------------------------------------------|---------------------------------------------------------|---------------------------------------------------------------------------------------------------|
| What is the name of the individual who carries a golfer's bag of clubs?                                              | caddy                                                   | greenskeeper, referee                                                                             |
| What sport does this athlete play? (presented with picture of baseball player)                                       | baseball                                                | soccer, football                                                                                  |
| What country hosts the major tennis tournament Wimbledon?                                                            | England                                                 | France, Brazil                                                                                    |
| What Olympic symbol is carried to the Olympic games by a relay of runners?                                           | torch                                                   | baton, candle                                                                                     |
| What 1960's basketball player was the first to score 100 points in a game?                                           | Wilt Chamberlain                                        | Dick Barnett, Kareem Abdul-Jabbar                                                                 |
| Which golf club would you use to hit the ball the farthest?                                                          | driver                                                  | wedge, putter                                                                                     |
| What does it mean for a baseball player to be "on deck" to bat for his team?                                         | is first in line                                        | is second in line, is third in line                                                               |
| What is the defensive move called when a football player forces an opposing player to the ground?                    | tackle                                                  | knockdown, ace                                                                                    |
| How many holes are on a professional golf course?                                                                    | 18                                                      | 9, 36                                                                                             |
| The MLB represents the Major League of what professional sport?                                                      | Major League Baseball                                   | Major League Basketball, Major League Bowling                                                     |
| What kind of sport ball is this? (presented with picture of basketball)                                              | basketball                                              | soccer ball, football                                                                             |
| What sport do the Philadelphia Flyers play?                                                                          | ice hockey                                              | football, baseball                                                                                |
| In baseball, what infielder stands between second and third base?                                                    | shortstop                                               | left outfielder, catcher                                                                          |
| What country did Mia Hamm play for in the Olympics?                                                                  | USA                                                     | England, Spain                                                                                    |
| Without extra innings, how many innings are in a professional baseball game?                                         | 9                                                       | 7, 2                                                                                              |
| What is it called when a legal serve cannot be returned by the opponent in tennis?                                   | ace                                                     | fault, strike                                                                                     |
| In billiards (or pool) what is it called when the white cue ball is knocked into a pocket?                           | scratch                                                 | re-rack, fumble                                                                                   |
| What is it called when a bowler knocks down all his pins on his first shot?                                          | strike                                                  | spare, split                                                                                      |
| What term is used for the area in which a football player scores a touchdown?                                        | end zone                                                | side zone, strike zone                                                                            |
| In the long jump, athletes jump into a pit filled with what material?                                                | sand                                                    | pebbles, water                                                                                    |
| In tennis, a score of "zero" may also be called what?                                                                | love                                                    | null, zip                                                                                         |
| In football, how many points is a touchdown worth?                                                                   | 6                                                       | 3, 1                                                                                              |
| What part of a standard bicycle is used to steer?                                                                    | handlebars                                              | pedals, gears                                                                                     |
| The athlete who finishes first in an Olympic event wins a gold medal. What kind of medal is awarded for third place? | bronze                                                  | copper, gold                                                                                      |
| How many points is a soccer goal worth?                                                                              | 1                                                       | 2, 6                                                                                              |
| What is the name of the object that a golfer places the ball on before swinging?                                     | tee                                                     | wedge, stand                                                                                      |
| What is dribbling in basketball?                                                                                     | bouncing the ball with your hands                       | holding the ball in your hands, kicking the ball with your feet                                   |
| In a golf match, what does it mean when a hole is described as a Par 4?                                              | It should only take 4 shots to put the ball in the hole | It is the 4th hardest hole in the golf course, No more than 4 people should play the hole at once |

Table S4. Stimulus Items: Art Recall and Recognition Tests

| Painting                                          | Artist                | Recognition Test Distractors                 |
|---------------------------------------------------|-----------------------|----------------------------------------------|
| Starry Night                                      | Vincent Van Gogh      | Paul Gauguin, Sandro Botticelli              |
| Sunrise                                           | Claude Monet          | Pierre-Auguste Renoir, Andrew Wyeth          |
| La Danse                                          | Henri Matisse         | Paul Klee, Domenico Ghirlandaio              |
| Garden of Earthly Delights                        | Hieronymus Bosch      | Pieter Brueghel the Elder, Mary Cassatt      |
| The Fighting Temeraire                            | Joseph Turner         | Claude Monet, René Magritte                  |
| Sunday Afternoon on the Island of La Grande Jatte | Georges Seurat        | Camille Pissarro, Roy Lichtenstein           |
| Around the Fish                                   | Paul Klee             | Henri Matisse, Caravaggio                    |
| Rain, Steam, and Speed                            | Joseph Turner         | Claude Monet, El Greco                       |
| Self Portrait with a Bandaged Ear                 | Vincent Van Gogh      | Paul Cézanne, Titian                         |
| Sunflowers                                        | Vincent Van Gogh      | Paul Cézanne, Jan Vermeer                    |
| View of Toledo                                    | El Greco              | Francisco Goya, Mark Rothko                  |
| A Girl with a Watering Can                        | Pierre-Auguste Renoir | Mary Cassatt, Willem de Kooning              |
| Birth of Venus                                    | Sandro Botticelli     | Domenico Ghirlandaio, Joan Miró              |
| Summertime                                        | Edward Hopper         | Andrew Wyeth, Wassily Kandinsky              |
| The Arnolfini Portrait; The Arnolfini Wedding     | Jan van Eyck          | Rogier van der Weyden, Max Ernst             |
| Rouen Cathedral in Full Sunlight                  | Claude Monet          | Pierre-Auguste Renoir, Robert Rauschenberg   |
| Crying Girl                                       | Roy Lichtenstein      | Andy Warhol, Pierre-Auguste Renoir           |
| The Treachery of Images                           | René Magritte         | Marcel Duchamp, Peter Paul Rubens            |
| Self Portrait                                     | Pablo Picasso         | Paul Cézanne, Giovanni Bellini               |
| Lady with a Unicorn                               | Raphael               | Leonardo da Vinci, Vincent Van Gogh          |
| Shooting of May 3rd                               | Francisco Goya        | Édouard Manet, Edward Hopper                 |
| Number 8                                          | Jackson Pollock       | Willem de Kooning, Georges Seurat            |
| Guernica                                          | Pablo Picasso         | Georges Braque, Leonardo da Vinci            |
| Luncheon of the Boating Party                     | Pierre-Auguste Renoir | Édouard Manet, Francisco Goya                |
| Mona Lisa                                         | Leonardo Da Vinci     | Raphael, Georges Braque                      |
| The Son of Man                                    | René Magritte         | Salvador Dalí, Édouard Manet                 |
| Venus of Urbino                                   | Titian                | Giovanni Bellini, Marcel Duchamp             |
| Twittering Machine                                | Paul Klee             | Joan Miró, Paul Cézanne                      |
| The Café Terrace on the Place du Forum            | Vincent Van Gogh      | Paul Cézanne, Jan van Eyck                   |
| A Bar at the Folies-Bergère                       | Édouard Manet         | Pierre-Auguste Renoir, Rogier van der Weyden |
| Virgin of the Rocks                               | Leonardo Da Vinci     | Michelangelo, Grant Wood                     |

|                                                         |                           |                                           |
|---------------------------------------------------------|---------------------------|-------------------------------------------|
| Arrangement in Grey and Black No.1 [Whistler's Mother]  | James Whistler            | Andrew Wyeth, Hieronymus Bosch            |
| Senecio                                                 | Paul Klee                 | Pablo Picasso, Pieter Brueghel the Elder  |
| The Girl with the Pearl Earring                         | Jan Vermeer               | Caravaggio, Jackson Pollock               |
| Where Do We Come From? What Are We? Where Are We Going? | Paul Gauguin              | Pablo Picasso, Diego Velázquez            |
| The Scream                                              | Edvard Munch              | Vincent Van Gogh, Raphael                 |
| Light Iris                                              | Georgia O'Keeffe          | Claude Monet, Edvard Munch                |
| The Creation of Adam                                    | Michelangelo              | Leonardo da Vinci, Camille Pissarro       |
| Jazz: The Horse, the Horsewoman and the Clown           | Henri Matisse             | Paul Klee, Claude Monet                   |
| Girl with Red Beret                                     | Pablo Picasso             | Paul Gauguin, Michelangelo                |
| Bridge Over a Pool of Water Lilies                      | Claude Monet              | Pierre-Auguste Renoir, Pablo Picasso      |
| Venus at the Mirror                                     | Peter Paul Rubens         | Titian, Vincent Van Gogh                  |
| Human Condition or Promenades of Euclid                 | René Magritte             | Max Ernst, Georgia O'Keeffe               |
| The Card Players                                        | Paul Cézanne              | Vincent Van Gogh, Salvador Dalí           |
| The Circus                                              | Georges Seurat            | Pierre-Auguste Renoir, Frans Hals         |
| Van Gogh's Room at Arles                                | Vincent Van Gogh          | Henri de Toulouse-Lautrec, James Whistler |
| The Dancing Class                                       | Edgar Degas               | Édouard Manet, Paul Klee                  |
| Las Meninas                                             | Diego Velázquez           | Francisco Goya, Maxfield Parrish          |
| Upside Down Figures                                     | Joan Miró                 | Wassily Kandinsky, Édouard Manet          |
| Goldfish                                                | Henri Matisse             | Vincent Van Gogh, Leonardo da Vinci       |
| Three Musicians                                         | Pablo Picasso             | Georges Braque, Paul Gauguin              |
| Apples and Oranges                                      | Paul Cézanne              | Paul Gauguin, Andy Warhol                 |
| The Persistence of Memory                               | Salvador Dalí             | Max Ernst, Claude Monet                   |
| The Kiss                                                | Gustav Klimt              | Maxfield Parrish, Joseph Turner           |
| Red Studio                                              | Henri Matisse             | Paul Klee, Edgar Degas                    |
| Self Portrait                                           | Rembrandt                 | Frans Hals, Gustav Klimt                  |
| The Dane in the Moulin Rouge                            | Henri de Toulouse-Lautrec | Édouard Manet, Paul Klee                  |
| Last Supper                                             | Leonardo da Vinci         | Michelangelo, Henri Matisse               |
| New Harmony                                             | Paul Klee                 | Mark Rothko, Pierre-Auguste Renoir        |
| American Gothic                                         | Grant Wood                | Andrew Wyeth, Pablo Picasso               |
| Campbell's Soup Cans                                    | Andy Warhol               | Robert Rauschenberg, Paul Cézanne         |
| Self Portrait                                           | Paul Gauguin              | Henri Matisse, Rembrandt                  |
| The Last Judgment                                       | Michelangelo              | El Greco, Henri de Toulouse-Lautrec       |

Table S5. Stimulus Items: Classical Music Recall and Recognition Tests

| Classical Music Piece                                | Composer                 | Recognition Test Distractors                  |
|------------------------------------------------------|--------------------------|-----------------------------------------------|
| Bolero                                               | Maurice Ravel            | Georges Bizet, Johann Pachelbel               |
| Rhapsody in Blue                                     | George Gershwin          | Leonard Bernstein, Ludwig van Beethoven       |
| Canon in D                                           | Johann Pachelbel         | Johann Sebastian Bach, Gustav Mahler          |
| Piano Concerto No. 2                                 | Sergei Rachmaninoff      | Pyotr Ilyich Tchaikovsky, John Williams       |
| Ride of the Valkyries                                | Richard Wagner           | Richard Strauss, Maurice Ravel                |
| Minuet in G Major                                    | Johann Sebastian Bach    | Wolfgang Amadeus Mozart, John Philip Sousa    |
| The Planets: Mars                                    | Gustav Holst             | John Williams, Edvard Grieg                   |
| Requiem: Lacrimosa                                   | Wolfgang Amadeus Mozart  | George Frideric Handel, Philip Glass          |
| The Firebird Suite: Finale                           | Igor Stravinsky          | Ottorino Respighi, George Frideric Handel     |
| Symphony No. 9: "Ode to Joy"                         | Ludwig van Beethoven     | George Frideric Handel, Georges Bizet         |
| The Tale of Tsar Saltan: The Flight of the Bumblebee | Nikolai Rimsky-Korsakov  | Sergei Rachmaninoff, Dave Brubeck             |
| Swan Lake                                            | Pyotr Ilyich Tchaikovsky | Camille Saint-Saëns, Gioachino Rossini        |
| The Marriage of Figaro: Overture                     | Wolfgang Amadeus Mozart  | Gioachino Rossini, Vince Guaraldi             |
| Water Music Suite in D Major: Alla Hornpipe          | George Frideric Handel   | Johann Sebastian Bach, Edward Elgar           |
| Orpheus in the Underworld: Infernal Gallop           | Jacques Offenbach        | Gioachino Rossini, Claude Debussy             |
| Pomp and Circumstance                                | Edward Elgar             | Felix Mendelssohn, Gioachino Rossini          |
| Jesu: The Joy of Man's Desiring                      | Johann Sebastian Bach    | Johann Pachelbel, Carl Orff                   |
| The Four Seasons: Spring                             | Antonio Vivaldi          | George Frideric Handel, Frédéric Chopin       |
| The Rite of Spring: Sacrificial Dance                | Igor Stravinsky          | Dmitri Shostakovich, Pyotr Ilyich Tchaikovsky |
| The Sleeping Beauty: Garland Waltz                   | Pyotr Ilyich Tchaikovsky | Johann Strauss, Wolfgang Amadeus Mozart       |
| Fanfare for the Common Man                           | Aaron Copland            | John Williams, Scott Joplin                   |
| Piano Concerto in A minor                            | Edvard Grieg             | Pyotr Ilyich Tchaikovsky, Henry Mancini       |
| The Carnival of the Animals: The Swan                | Camille Saint-Saëns      | Franz Liszt, Jimmy Dorsey                     |
| The Magic Flute: Queen of the Night                  | Wolfgang Amadeus Mozart  | Gioachino Rossini, Ottorino Respighi          |
| A Midsummer Night's Dream: Wedding March             | Felix Mendelssohn        | Richard Wagner, Nikolai Rimsky-Korsakov       |
| Maple Leaf Rag                                       | Scott Joplin             | Joseph Lamb, Ludwig van Beethoven             |
| Claire de Lune                                       | Claude Debussy           | Philip Glass, Frédéric Chopin                 |
| Brandenburg Concerto no. 3                           | Johann Sebastian Bach    | George Frideric Handel, Aaron Copland         |
| Peter and the Wolf: The Story Begins                 | Sergei Prokofiev         | Edvard Grieg, Robert Schumann                 |
| Baby Elephant Walk                                   | Henry Mancini            | Dave Brubeck, Johann Sebastian Bach           |



|                                              |                          |                                                  |
|----------------------------------------------|--------------------------|--------------------------------------------------|
| Symphony no. 5                               | Ludwig van Beethoven     | Felix Mendelssohn, George Gershwin               |
| 1812 Overture                                | Pyotr Ilyich Tchaikovsky | Gioachino Rossini, George Frideric Handel        |
| Peer Gynt Suite No. 1: Morning Mood          | Edvard Grieg             | Sergei Prokofiev, Ennio Morricone                |
| Blue Danube Waltz                            | Johann Strauss           | Pyotr Ilyich Tchaikovsky, George Frideric Handel |
| The Entertainer                              | Scott Joplin             | James Scott, Richard Strauss                     |
| Toccat and Fugue                             | Johann Sebastian Bach    | Wolfgang Amadeus Mozart, Hoagy Carmichael        |
| Funeral March                                | Frédéric Chopin          | Ludwig van Beethoven, Antonín Dvořák             |
| Moonlight Serenade                           | Glenn Miller             | Jimmy Dorsey, Johannes Brahms                    |
| Cello Suite 1 in G Major                     | Johann Sebastian Bach    | Ludwig van Beethoven, Jacques Offenbach          |
| Piano Sonata No. 8 in C Minor "Pathetique"   | Ludwig van Beethoven     | Wolfgang Amadeus Mozart, Richard Wagner          |
| Carmen: Les Toreadors                        | Georges Bizet            | Gioachino Rossini, Joseph Lamb                   |
| Carmina Burana: O Fortuna                    | Carl Orff                | Gustav Mahler, Pyotr Ilyich Tchaikovsky          |
| Also Sprach Zarathustra                      | Richard Strauss          | John Williams, Franz Schubert                    |
| Marche Slave                                 | Pyotr Ilyich Tchaikovsky | Antonín Dvořák, Joseph Hadyn                     |
| Symphony No. 9 "New World"                   | Antonín Dvořák           | Richard Wagner, Wolfgang Amadeus Mozart          |
| Eine Kleine Nachtmusik                       | Wolfgang Amadeus Mozart  | Johann Sebastian Bach, Dmitri Shostakovich       |
| Brahms Lullaby                               | Johannes Brahms          | Franz Schubert, James Scott                      |
| Symphony No. 40                              | Wolfgang Amadeus Mozart  | Felix Mendelssohn, Richard Wagner                |
| Bagatelle No. 25 in A Minor "Für Elise"      | Ludwig van Beethoven     | Franz Liszt, Igor Stravinsky                     |
| Piano Sonata No. 11 in A Major: Alla Turca   | Wolfgang Amadeus Mozart  | Joseph Hadyn, Glenn Miller                       |
| The Barber of Seville: Overture              | Gioachino Rossini        | Wolfgang Amadeus Mozart, Sergei Rachmaninoff     |
| Linus and Lucy                               | Vince Guaraldi           | Hoagy Carmichael, Camille Saint-Saëns            |
| The Four Seasons: Winter                     | Antonio Vivaldi          | Wolfgang Amadeus Mozart, Franz Liszt             |
| The Stars and Stripes Forever                | John Philip Sousa        | Johann Strauss, Felix Mendelssohn                |
| Orchestral Suite no. 2 in B minor: Badinerie | Johann Sebastian Bach    | Antonio Vivaldi, Johann Strauss                  |
| Carmen: Habanera                             | Georges Bizet            | Maurice Ravel, Antonio Vivaldi                   |
| Rodeo: Hoedown                               | Aaron Copland            | Ennio Morricone, Wolfgang Amadeus Mozart         |

Table S6. Stimulus Items: United States History Recall Test

| Question                                                                   | Sample Acceptable Responses                                                                                      |
|----------------------------------------------------------------------------|------------------------------------------------------------------------------------------------------------------|
| What is one right or freedom from the 1st Amendment?                       | Speech, religion, assembly, press, petition the government                                                       |
| What is the economic system in the US?                                     | Capitalist economy, market economy                                                                               |
| Name one or more branches or parts of the government.                      | Congress, legislative, president, executive, the courts, judicial                                                |
| What are the two parts of the US Congress?                                 | Senate and House of Representatives                                                                              |
| Who is one of your state's U.S. Senators now?                              | [Acceptable response varied with state of residence]                                                             |
| In what month do we vote for President?                                    | November                                                                                                         |
| What is the name of the President of the United States now?                | Barack Obama                                                                                                     |
| What is the capital of your state?                                         | [Acceptable response varied with state of residence]                                                             |
| What are the two major political parties in the United States?             | Democratic and Republican                                                                                        |
| What is one responsibility that is <u>only</u> for United States citizens? | serve on a jury, vote in a federal election                                                                      |
| How old do citizens have to be to vote for President?                      | 18 and older                                                                                                     |
| When is the last day you can send in federal income tax forms?             | April 15                                                                                                         |
| Who was the first President?                                               | George Washington                                                                                                |
| What important thing(s) did Abraham Lincoln do?                            | freed the slaves (Emancipation Proclamation, saved (or preserved) Union, led the US during the Civil War         |
| Name one or more wars fought by the United States in the 1900s.            | WWI, WWII, Korean War, Vietnam War, (Persian) Gulf War                                                           |
| What did Martin Luther King, Jr. do?                                       | fought for civil rights, worked for equality for all Americans                                                   |
| What is the capital of the United States?                                  | Washington, D.C.                                                                                                 |
| Where is the Statue of Liberty?                                            | New York (Harbor), Liberty Island, Also OK are NJ, near NYC, on the Hudson (River)                               |
| Why does the flag have 50 stars?                                           | there is one star for each state, each star represents a state, there are 50 states                              |
| When do we celebrate Independence Day?                                     | July 4                                                                                                           |
| Why did colonists come to America?                                         | freedom, political liberty, religious freedom, economic opportunity, practice their religion, escape persecution |
| Who lived in American before the Europeans arrived?                        | American Indians, Native Americans                                                                               |
| What group of people was taken to America and sold as slaves?              | Africans, people from Africa                                                                                     |

|                                                                                             |                                                                                                                                                                         |
|---------------------------------------------------------------------------------------------|-------------------------------------------------------------------------------------------------------------------------------------------------------------------------|
| Why did the colonists fight the British?                                                    | high taxes (taxation w/o representation), the British army stayed in their houses (boarding, quartering), they didn't have self-government                              |
| Who wrote the Declaration of Independence?                                                  | Thomas Jefferson                                                                                                                                                        |
| When was the Declaration of Independence adopted?                                           | July 4, 1776                                                                                                                                                            |
| There were 13 original states. Can you name some?                                           | New Hampshire, Massachusetts, Rhode Island, Connecticut, New York, New Jersey, Pennsylvania, Delaware, Maryland, Virginia, North Carolina, South Carolina, Georgia      |
| What happened at the Constitutional Convention?                                             | The Constitution was written, the Founding Fathers wrote the Constitution                                                                                               |
| When was the Constitution written?                                                          | 1787                                                                                                                                                                    |
| The Federalist Papers supported the passage of the U.S. Constitution. Who were the authors? | James Madison, Alexander Hamilton, John Jay, Publius (pseudonym used by authors)                                                                                        |
| What is Benjamin Franklin famous for?                                                       | U.S. diplomat, oldest member of the Constitutional Convention, first Postmaster General of the US, writer of "Poor Richard's Almanac", started the first free libraries |
| Who is the "Father of Our Country"?                                                         | George Washington                                                                                                                                                       |
| What territory did the United States buy from France in 1803?                               | the Louisiana Territory, Louisiana                                                                                                                                      |
| Name one or more wars fought by the United States in the 1800s.                             | War of 1812, Mexican-American War, Civil War, Spanish-American War                                                                                                      |
| Name the U.S. war between the North and the South.                                          | the Civil War, the War between the States                                                                                                                               |
| Name one or more problems that led to the Civil War.                                        | slavery, economic reasons, states' rights                                                                                                                               |
| What did the Emancipation Proclamation do?                                                  | freed the slaves, freed slaves in the Confederacy/the Confederate states/most Southern states                                                                           |
| What did Susan B. Anthony do?                                                               | fought for women's rights, fought for civil rights                                                                                                                      |
| Who was President during World War I?                                                       | Woodrow Wilson                                                                                                                                                          |
| Who was President during the Great Depression and World War II?                             | Franklin Roosevelt                                                                                                                                                      |
| Who did the United States fight in World War II?                                            | Japan, Germany, and Italy                                                                                                                                               |
| Before he was President, Eisenhower was a general. What war was he in?                      | World War II                                                                                                                                                            |
| During the Cold War, what was the main concern of the United States?                        | Communism                                                                                                                                                               |
| What movement tried to end racial discrimination?                                           | civil rights (movement)                                                                                                                                                 |
| What major event happened on September 11, 2001, in the United States?                      | Terrorists attacked the United States                                                                                                                                   |
| Name one or more American Indian tribes in the United States.                               | Cherokee, Navajo, Sioux, Chippewa, Choctaw, Pueblo, Apache, Iroquois, Creek, Blackfeet, Seminole, Cheyenne, Arawak                                                      |

Table S7. Stimulus Items: United States History Recognition Test

| <b>Famous Individual</b> | <b>President?</b> |
|--------------------------|-------------------|
| Douglas MacArthur        | N                 |
| Thurgood Marshall        | N                 |
| John Tyler               | Y                 |
| Orville Wright           | N                 |
| George H.W. Bush         | Y                 |
| John Quincy Adams        | Y                 |
| Thomas Edison            | N                 |
| William Lloyd Garrison   | N                 |
| Frederick Douglass       | N                 |
| James Fenimore Cooper    | N                 |
| George W. Bush           | Y                 |
| Benjamin Harrison        | Y                 |
| Woodrow Wilson           | Y                 |
| James Madison            | Y                 |
| Lyndon B. Johnson        | Y                 |
| J.P. Morgan              | N                 |
| James K. Polk            | Y                 |
| James A. Garfield        | Y                 |
| John C. Calhoun          | N                 |
| Henry David Thoreau      | N                 |
| William Randolph Hearst  | N                 |
| James Monroe             | Y                 |
| William Henry Harrison   | Y                 |
| Grover Cleveland         | Y                 |
| Oliver Wendell Holmes    | N                 |
| Earl Warren              | N                 |
| Franklin D. Roosevelt    | Y                 |
| Rutherford B. Hayes      | Y                 |
| Zachary Taylor           | Y                 |
| Charles Lindbergh        | N                 |
| Robert E. Lee            | N                 |
| Brigham Young            | N                 |
| Benjamin Franklin        | N                 |
| Martin Van Buren         | Y                 |
| Jimmy Carter             | Y                 |
| Thomas Jefferson         | Y                 |
| Richard Nixon            | Y                 |
| Walter Mondale           | N                 |
| Hubert H. Humphrey       | N                 |
| Benedict Arnold          | N                 |
| Harry S. Truman          | Y                 |
| Andrew Carnegie          | N                 |

|                        |   |
|------------------------|---|
| Herbert C. Hoover      | Y |
| Walter Cronkite        | N |
| Alexander Hamilton     | N |
| Thomas Paine           | N |
| Mark Twain             | N |
| Ulysses S. Grant       | Y |
| John Wilkes Booth      | N |
| Theodore Roosevelt     | Y |
| Walt Whitman           | N |
| Warren G. Harding      | Y |
| Andrew Jackson         | Y |
| Bill Clinton           | Y |
| Bob Dole               | N |
| William McKinley       | Y |
| William Howard Taft    | Y |
| Horace Mann            | N |
| Dwight D. Eisenhower   | Y |
| Franklin Pierce        | Y |
| William Jennings Bryan | N |
| John Dewey             | N |
| Francis Scott Key      | N |
| Calvin Coolidge        | Y |
| Stephen Foster         | N |
| Chester A. Arthur      | Y |
| John D. Rockefeller    | N |
| Gerald Ford            | Y |
| Frank Lloyd Wright     | N |
| Ralph Waldo Emerson    | N |
| Abraham Lincoln        | Y |
| Cyrus McCormick        | N |
| Barack Obama           | Y |
| James Buchanan         | Y |
| Adlai Stevenson        | N |
| Daniel Boone           | N |
| George Washington      | Y |
| Bill Gates             | N |
| Henry Clay             | N |
| George Patton          | N |
| John Adams             | Y |
| John F. Kennedy        | Y |
| Andrew Johnson         | Y |
| Louis Sullivan         | N |
| Ronald Reagan          | Y |
| Millard Fillmore       | Y |
